# Supplementary material for: Predicting Food Safety Compliance for Informed Food Outlet Inspections: A Machine Learning Approach
Source: MDPI journal article supplement (doi:10.3390/ijerph182312635), 2021-11-30
Supplement: s1 [file s1]

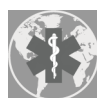

Supplementary Material

**Table S1.** Sensitivity, specificity, precision, and kappa for all models.

| Sampling Strategy |               | Model | Sensitivity | Specificity | Precision | Kappa |
|-------------------|---------------|-------|-------------|-------------|-----------|-------|
| SMOTE             | Linear SVM    | 1     | 0.670       | 0.604       | 0.109     | 0.020 |
|                   |               | 2     | 0.935       | 0.193       | 0.075     | 0.080 |
|                   |               | 4     | 0.720       | 0.555       | 0.102     | 0.070 |
|                   |               | 5     | 0.993       | 0.040       | 0.068     | 0.004 |
|                   | Radial SVM    | 2     | 0.724       | 0.696       | 0.144     | 0.146 |
|                   |               | 3     | 0.735       | 0.691       | 0.143     | 0.146 |
|                   |               | 4     | 0.663       | 0.718       | 0.142     | 0.141 |
|                   |               | 5     | 0.728       | 0.655       | 0.130     | 0.122 |
| Under Sampling    | Linear SVM    | 1     | 0.652       | 0.641       | 0.114     | 0.092 |
|                   |               | 2     | 0.897       | 0.259       | 0.079     | 0.027 |
|                   |               | 3     | 0.898       | 0.262       | 0.079     | 0.027 |
|                   |               | 4     | 0.610       | 0.681       | 0.119     | 0.010 |
|                   |               | 5     | 0.598       | 0.684       | 0.118     | 0.098 |
|                   | Radial SVM    | 2     | 0.648       | 0.644       | 0.114     | 0.092 |
|                   |               | 3     | 0.616       | 0.685       | 0.121     | 0.104 |
|                   |               | 4     | 0.603       | 0.703       | 0.125     | 0.111 |
|                   | Random Forest | 1     | 0.652       | 0.683       | 0.127     | 0.115 |
|                   |               | 2     | 0.623       | 0.701       | 0.128     | 0.116 |
|                   |               | 3     | 0.649       | 0.686       | 0.127     | 0.115 |
|                   |               | 4     | 0.658       | 0.673       | 0.124     | 0.111 |
| 5                 |               | 0.631 | 0.698       | 0.128       | 0.112     |       |

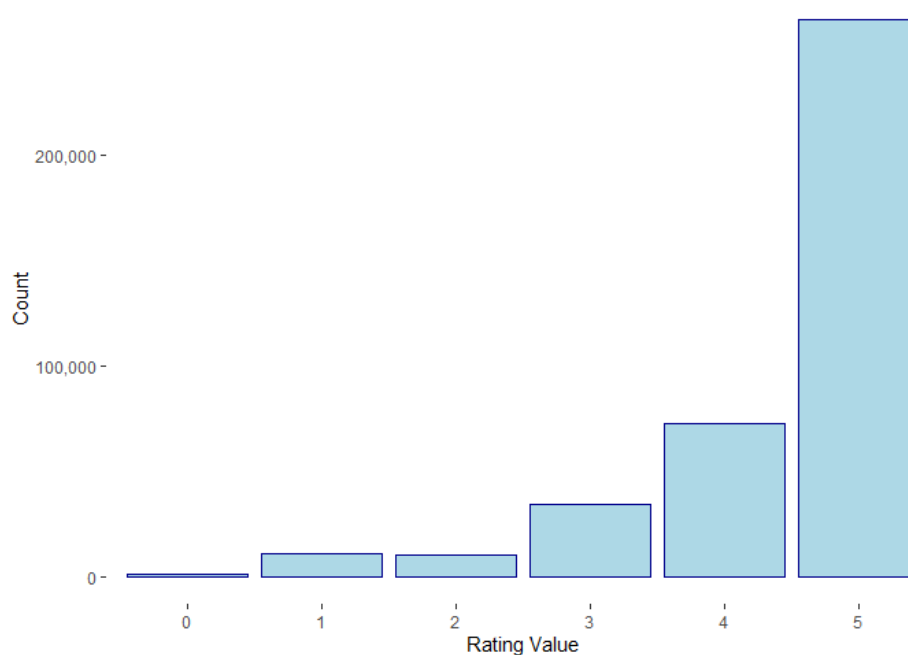

**Figure S1.** Count of Food Hygiene Rating Scheme Scores in England and Wales.

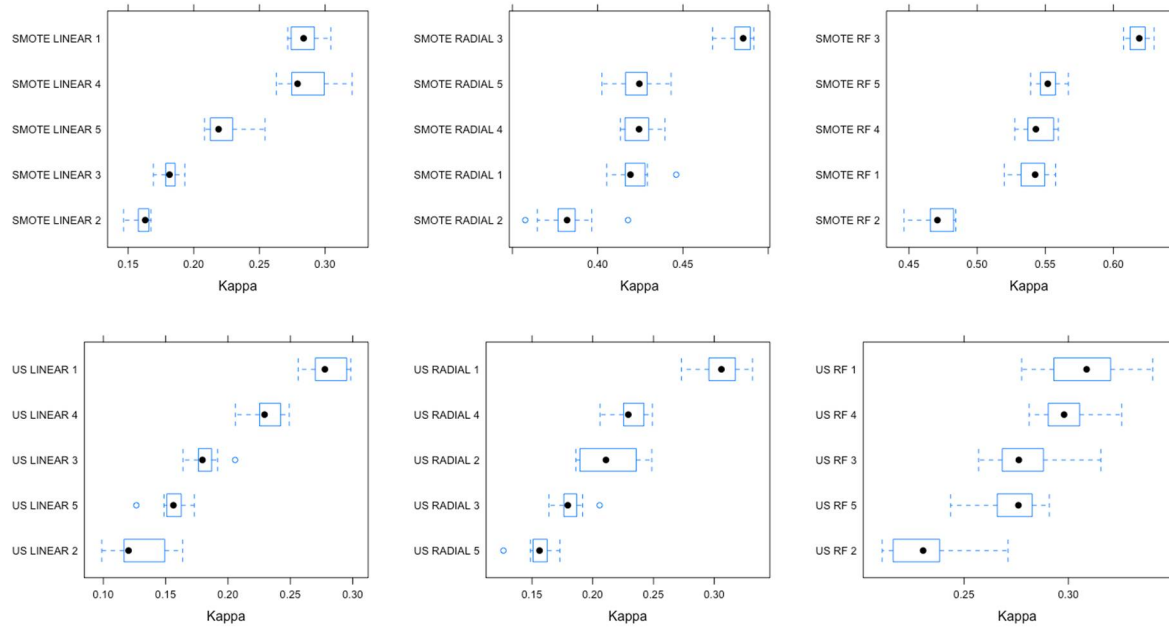

**Figure S2.** Box and whisker plots are generated for the Kappa metric averaged for cross-validation iterations. The minimum, maximum, mean and interquartile range are calculated for each model. Where US = under-sampled datasets; SMOTE = Synthetic Minority Oversampling Technique datasets; Linear = Linear SVM; Radial = Radial SVM; RF = Random Forest. Suffixed numbers represent sampling ratios of non-compliant to compliant food outlets as follows: 1= 1:1; 2= 2:1; 3= 3:2; 4= 2:3; 5= 1:2.

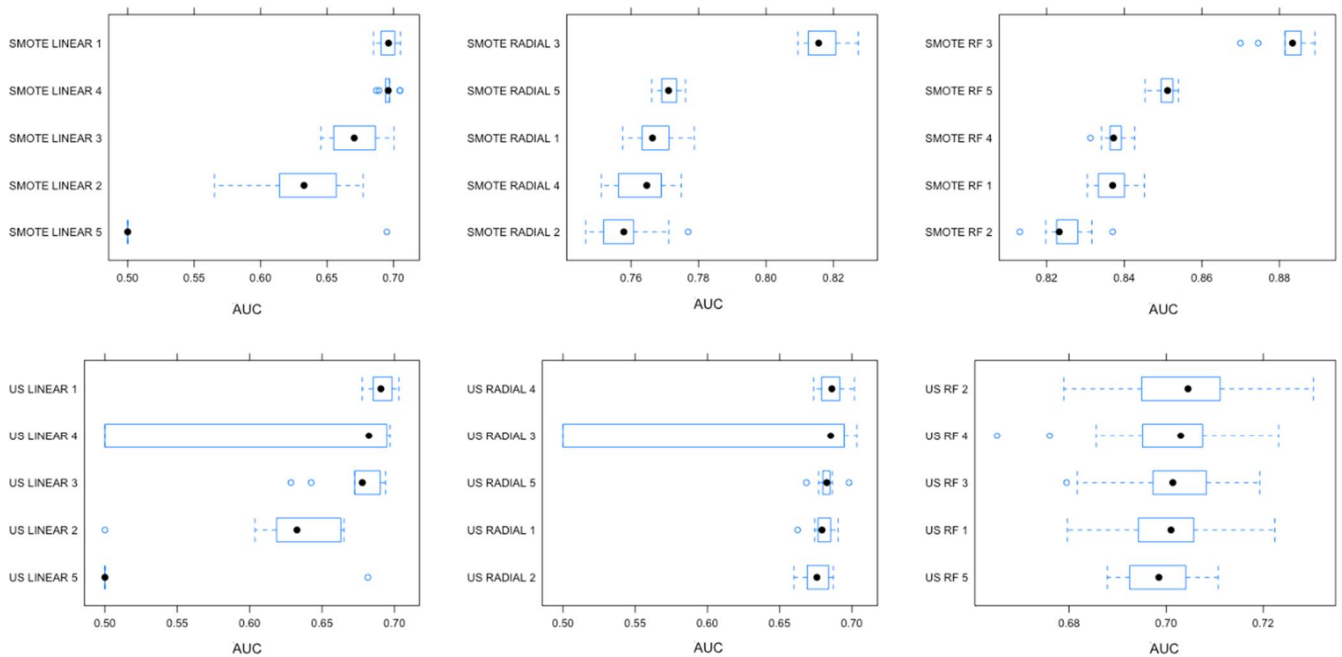

**Figure S3.** Box and whisker plots are generated for the AUC metric averaged for cross-validation iterations. The minimum, maximum, mean and interquartile range are calculated for each model. Where US = under-sampled datasets; SMOTE = Synthetic Minority Oversampling Technique datasets; Linear = Linear SVM; Radial = Radial SVM; RF = Random Forest. Suffixed numbers represent sampling ratios of non-compliant to compliant food outlets as follows: 1= 1:1; 2= 2:1; 3= 3:2; 4= 2:3; 5= 1:2.

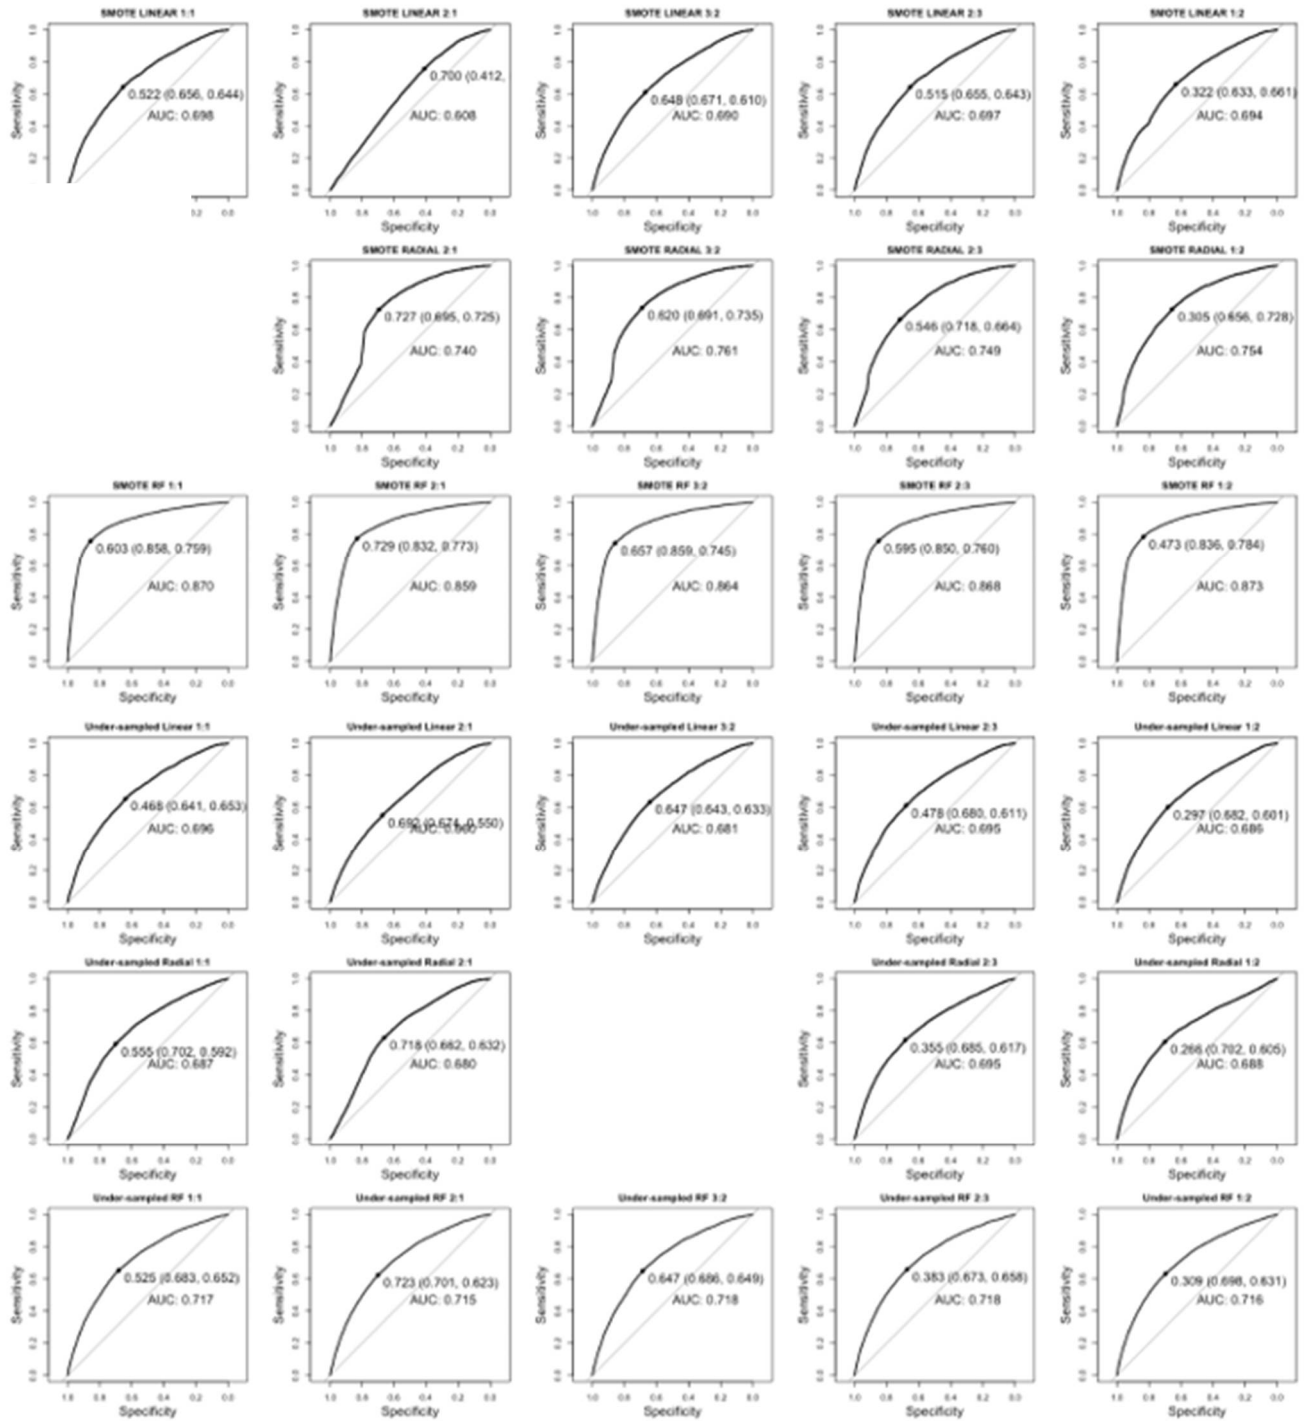

**Figure S4.** ROC curves and AUC values are generated for each model. Steep ROC curves and high AUC values indicate better performance than shallow ROC curves and low AUC values. SMOTE Radial 1 and under-sampled Radial 3 did not converge.
